# Supplementary material for: Empirical comparisons of heterogeneity magnitudes of the risk difference, relative risk, and odds ratio
Source: PubMed Central journal article supplement (PMC8840324; doi:10.1186/s13643-022-01895-7), 2022-02-12
Supplement: 13643_2022_1895_MOESM1_ESM.pdf [file 13643_2022_1895_MOESM1_ESM.pdf]

**Supplemental File for**  
**“Empirical comparisons of heterogeneity magnitudes of the risk difference, relative risk, and odds ratio”**

**Table S1.** Summary of situations where  $\hat{\tau}$  is not calculable or takes very small values ( $<0.01$ ) among the 64,929 meta-analyses.

| <b>Method</b> | <b>Effect measure</b> | <b>No. of MAs with REML failing to converge</b> | <b>No. of MAs with <math>\hat{\tau}&lt;0.01</math></b> | <b>No. of MAs with <math>\hat{\tau}\geq 0.01</math></b> |
|---------------|-----------------------|-------------------------------------------------|--------------------------------------------------------|---------------------------------------------------------|
| DL            | RD                    | NA                                              | 34,284 (52.80%)                                        | 30,645 (47.20%)                                         |
|               | RR                    | NA                                              | 36,833 (56.73%)                                        | 28,096 (43.27%)                                         |
|               | OR                    | NA                                              | 36,521 (56.25%)                                        | 28,408 (43.75%)                                         |
| REML          | RD                    | 35 (0.05%)                                      | 35,345 (54.44%)                                        | 29,549 (45.51%)                                         |
|               | RR                    | 144 (0.22%)                                     | 37,378 (57.57%)                                        | 27,407 (42.21%)                                         |
|               | OR                    | 143 (0.22%)                                     | 36,879 (56.80%)                                        | 27,907 (42.98%)                                         |

Note: NA, not applicable; DL, DerSimonian–Laird; MA, meta-analysis; REML, restricted maximum likelihood.

**Table S2.** Summary of situations where  $I^2$  is not calculable, equals 0%, or takes very small values ( $\leq 1\%$ ) among the 64,929 meta-analyses.

| <b>Method</b> | <b>Effect measure</b> | <b>No. of MAs with REML failing to converge</b> | <b>No. of MAs with <math>I^2=0\%</math></b> | <b>No. of MAs with <math>0\%&lt;I^2\leq 1\%</math></b> | <b>No. of MAs with <math>I^2&gt;1\%</math></b> |
|---------------|-----------------------|-------------------------------------------------|---------------------------------------------|--------------------------------------------------------|------------------------------------------------|
| DL            | RD                    | NA                                              | 31,222 (48.09%)                             | 219 (0.34%)                                            | 31,441 (48.42%)                                |
|               | RR                    | NA                                              | 36,786 (56.66%)                             | 234 (0.36%)                                            | 37,020 (57.02%)                                |
|               | OR                    | NA                                              | 36,506 (56.22%)                             | 261 (0.40%)                                            | 36,767 (56.63%)                                |
| REML          | RD                    | 35 (0.05%)                                      | 28,283 (43.56%)                             | 3,709 (5.71%)                                          | 31,992 (49.27%)                                |
|               | RR                    | 144 (0.22%)                                     | 32,718 (50.39%)                             | 4,889 (7.53%)                                          | 37,607 (57.92%)                                |
|               | OR                    | 143 (0.22%)                                     | 32,752 (50.44%)                             | 4,368 (6.73%)                                          | 37,120 (57.17%)                                |

Note: NA, not applicable; DL, DerSimonian–Laird; MA, meta-analysis; REML, restricted maximum likelihood.

**Table S3.** Comparisons between  $I^2$  of the RD, RR, and OR within the 64,929 meta-analyses.

| Method | Comparison<br>(X vs. Y) | No. of MAs with<br>REML failing<br>to converge in<br>the comparison | No. of MAs with $I_X^2 - I_Y^2$ |                       |                      |                    |                    |                   |                    |
|--------|-------------------------|---------------------------------------------------------------------|---------------------------------|-----------------------|----------------------|--------------------|--------------------|-------------------|--------------------|
|        |                         |                                                                     | $\leq -25\%$                    | $-25\%$ to<br>$-10\%$ | $-10\%$ to<br>$-1\%$ | $-1\%$ to $1\%$    | $1\%$ to $10\%$    | $10\%$ to $25\%$  | $\geq 25\%$        |
| DL     | RD vs. RR               | NA                                                                  | 0                               | 0                     | 7,923<br>(12.20%)    | 30,131<br>(46.41%) | 9,116<br>(14.04%)  | 8,516<br>(13.12%) | 9,243<br>(14.24%)  |
|        | RD vs. OR               | NA                                                                  | 0                               | 0                     | 6,538<br>(10.07%)    | 31,197<br>(48.05%) | 10,534<br>(16.22%) | 8,562<br>(13.19%) | 8,098<br>(12.47%)  |
|        | RR vs. OR               | NA                                                                  | 0                               | 0                     | 15,552<br>(23.95%)   | 41,259<br>(63.54%) | 4,610<br>(7.10%)   | 1,874<br>(2.89%)  | 1,634<br>(2.52%)   |
| REML   | RD vs. RR               | 176 (0.27%)                                                         | 0                               | 0                     | 10,041<br>(15.46%)   | 29,487<br>(45.41%) | 8,036<br>(12.38%)  | 7,093<br>(10.92%) | 10,096<br>(15.55%) |
|        | RD vs. OR               | 174 (0.27%)                                                         | 0                               | 0                     | 8,587<br>(13.23%)    | 30,491<br>(46.96%) | 9,373<br>(14.44%)  | 7,401<br>(11.40%) | 8,903<br>(13.71%)  |
|        | RR vs. OR               | 201 (0.31%)                                                         | 0                               | 0                     | 14,142<br>(21.78%)   | 41,455<br>(63.85%) | 5,285<br>(8.14%)   | 2,111<br>(3.25%)  | 1,735<br>(2.67%)   |

Note: NA, not applicable; DL, DerSimonian–Laird; MA, meta-analysis; REML, restricted maximum likelihood.

**Table S4.** *Q* test results (with the significance level at 0.05) among the pairs of RD, RR, and OR within the 64,929 meta-analyses.

| Pair<br>(X vs. Y) | <i>Q</i> test result based on<br>the effect measure X | <i>Q</i> test result based on the effect measure Y                |                                                               |
|-------------------|-------------------------------------------------------|-------------------------------------------------------------------|---------------------------------------------------------------|
|                   |                                                       | No. of meta-analyses with<br>non-significant <i>Q</i> test result | No. of meta-analyses with<br>significant <i>Q</i> test result |
| RD vs. RR         | Non-significant                                       | 50,050 (77.08%)                                                   | 926 (1.43%)                                                   |
|                   | Significant                                           | 6,615 (10.19%)                                                    | 7,338 (11.30%)                                                |
| RD vs. OR         | Non-significant                                       | 50,391 (77.61%)                                                   | 585 (0.90%)                                                   |
|                   | Significant                                           | 6,090 (9.38%)                                                     | 7,863 (12.11%)                                                |
| RR vs. OR         | Non-significant                                       | 55,351 (85.25%)                                                   | 1,314 (2.02%)                                                 |
|                   | Significant                                           | 1,130 (1.74%)                                                     | 7,134 (10.99%)                                                |

**Table S5.** Summary of descriptive statistics of  $I^2$  (%) among the 23,966 meta-analyses with  $I^2 > 0\%$  for all three effect measures based on both the DL and REML methods.

| <b>Method</b> | <b>Effect measure</b> | <b>Mean</b> | <b>1<sup>st</sup> quartile</b> | <b>Median</b> | <b>3<sup>rd</sup> quartile</b> |
|---------------|-----------------------|-------------|--------------------------------|---------------|--------------------------------|
| DL            | RD                    | 58.3        | 41.5                           | 61.0          | 77.4                           |
|               | RR                    | 48.2        | 29.0                           | 49.1          | 67.8                           |
|               | OR                    | 49.7        | 31.3                           | 50.6          | 68.4                           |
| REML          | RD                    | 57.4        | 38.8                           | 61.9          | 79.4                           |
|               | RR                    | 46.7        | 25.4                           | 48.4          | 69.3                           |
|               | OR                    | 48.4        | 28.9                           | 50.3          | 69.6                           |

Note: DL, DerSimonian–Laird; REML, restricted maximum likelihood.

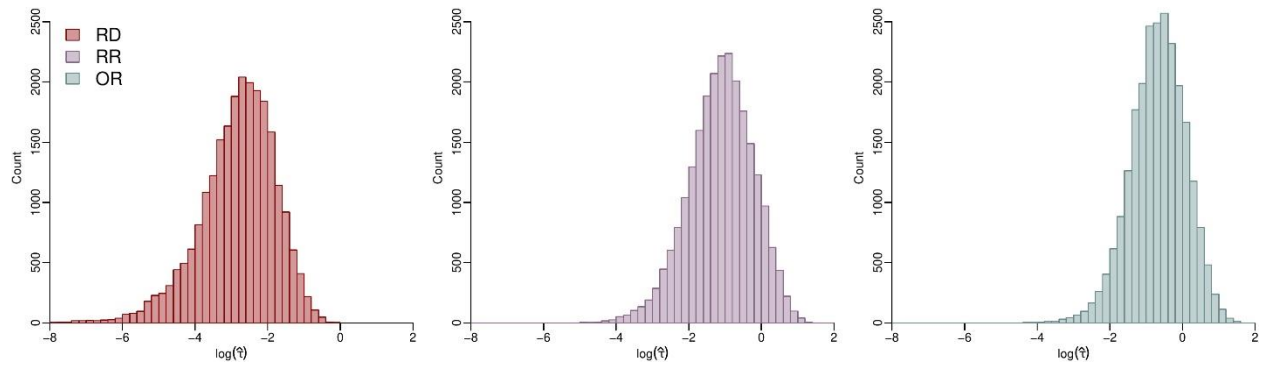

**Figure S1.** Histograms of between-study standard deviations on a logarithmic scale based on the DerSimonian–Laird method for the RD, RR, and OR. The histograms are restricted to the range from  $-8$  to  $2$  for  $\log \hat{\tau}$ .

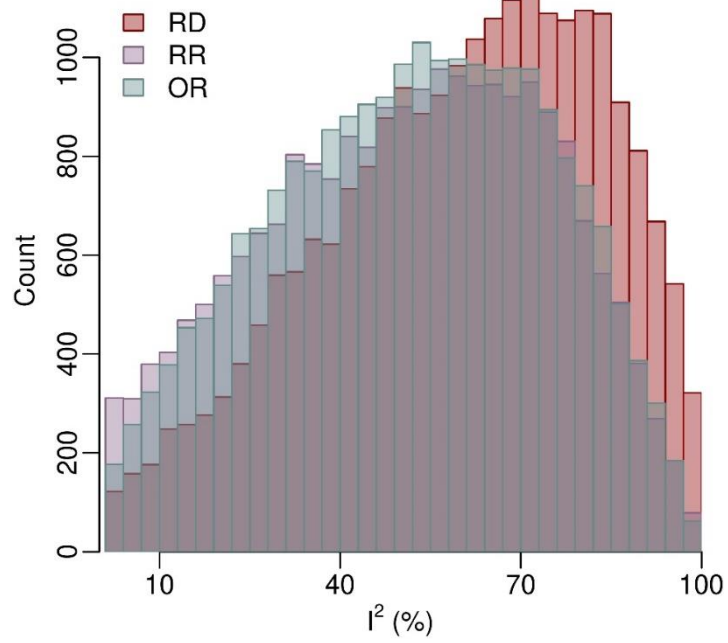

**Figure S2.** Histogram of  $I^2$  based on the DerSimonian–Laird method for the RD, RR, and OR, restricted to  $I^2 > 1\%$  for better visualizations.



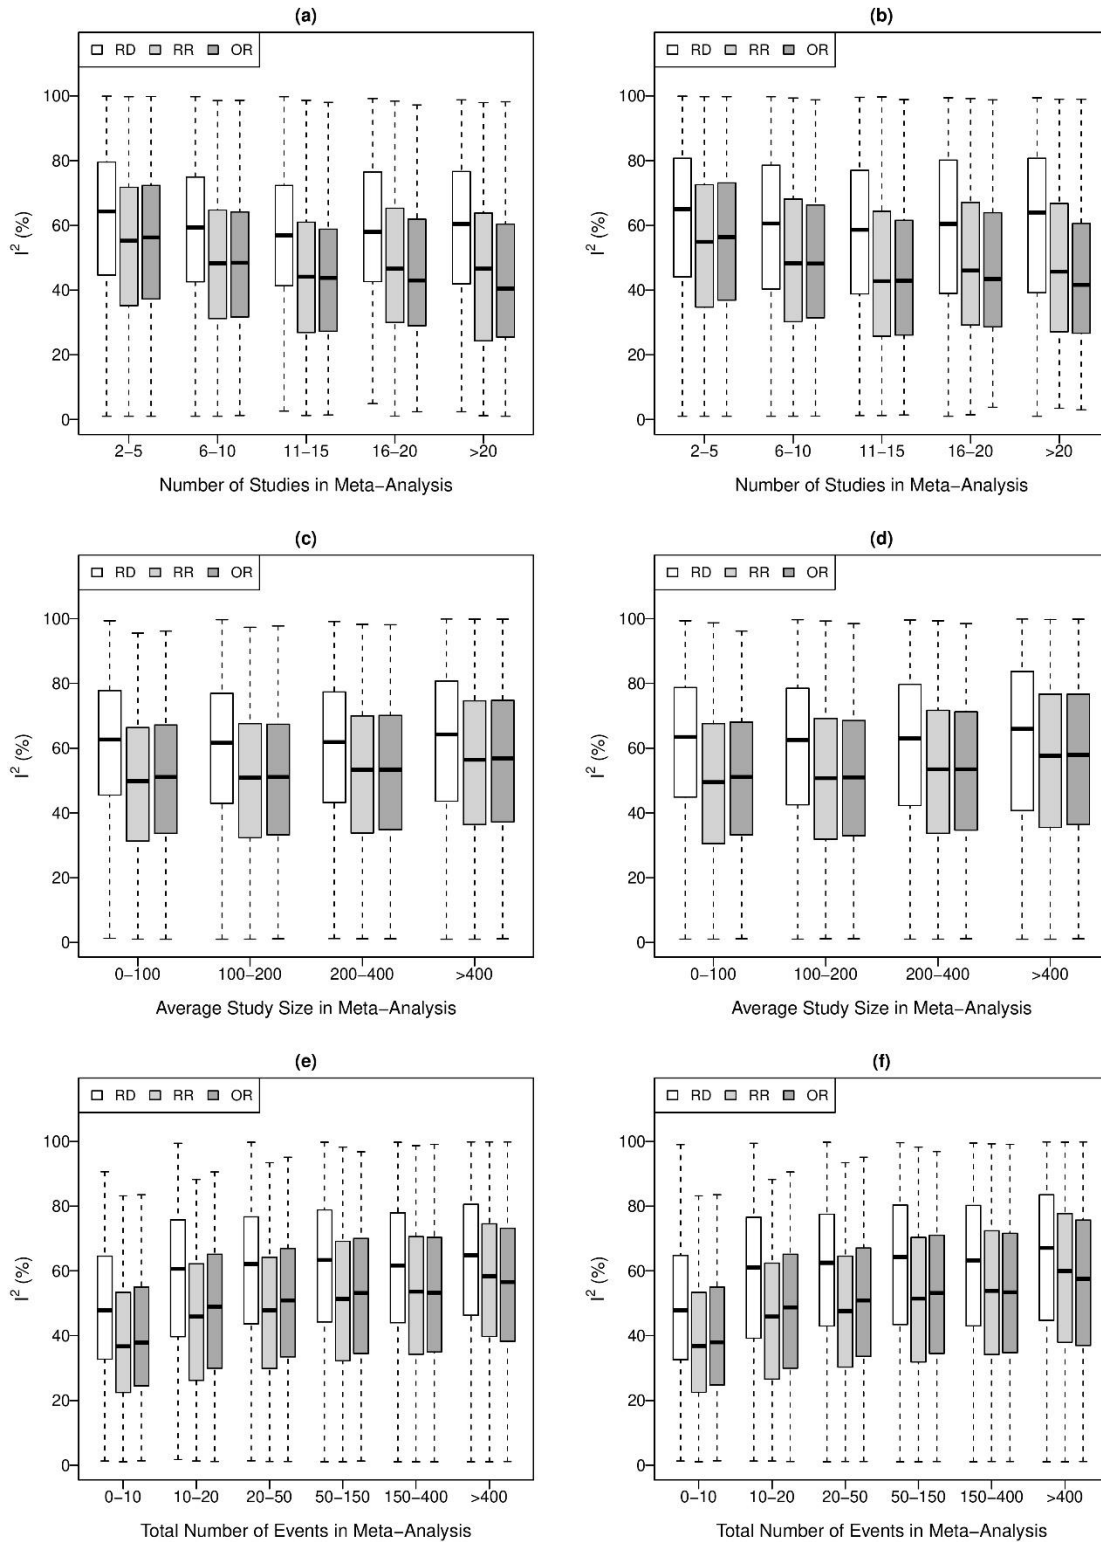

**Figure S3.** Boxplots of  $I^2$  for the RD, RR, and OR categorized by the number of studies (panels a and b), average study size (panels c and d), and total number of events (panels e and f), restricted to  $I^2 > 1\%$ . The left panels a, c, and e are based on the DerSimonian–Laird method, and the right panels b, d, and f are based on the restricted maximum likelihood (REML) method.

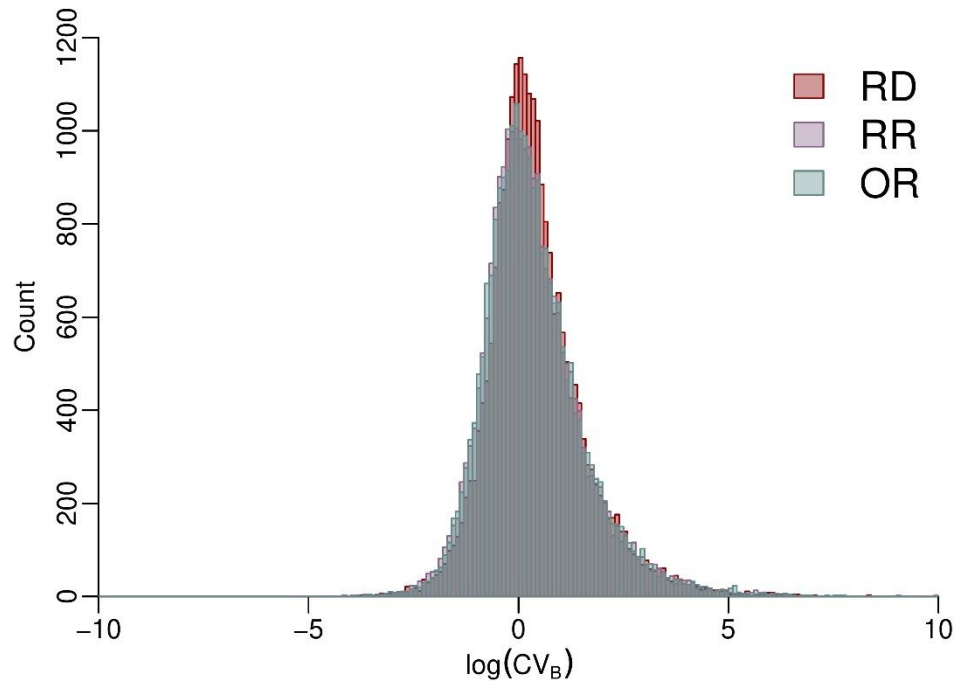

**Figure S4.** Histogram of  $CV_B$  on a logarithmic scale based on the DerSimonian–Laird method for the RD, RR, and OR.

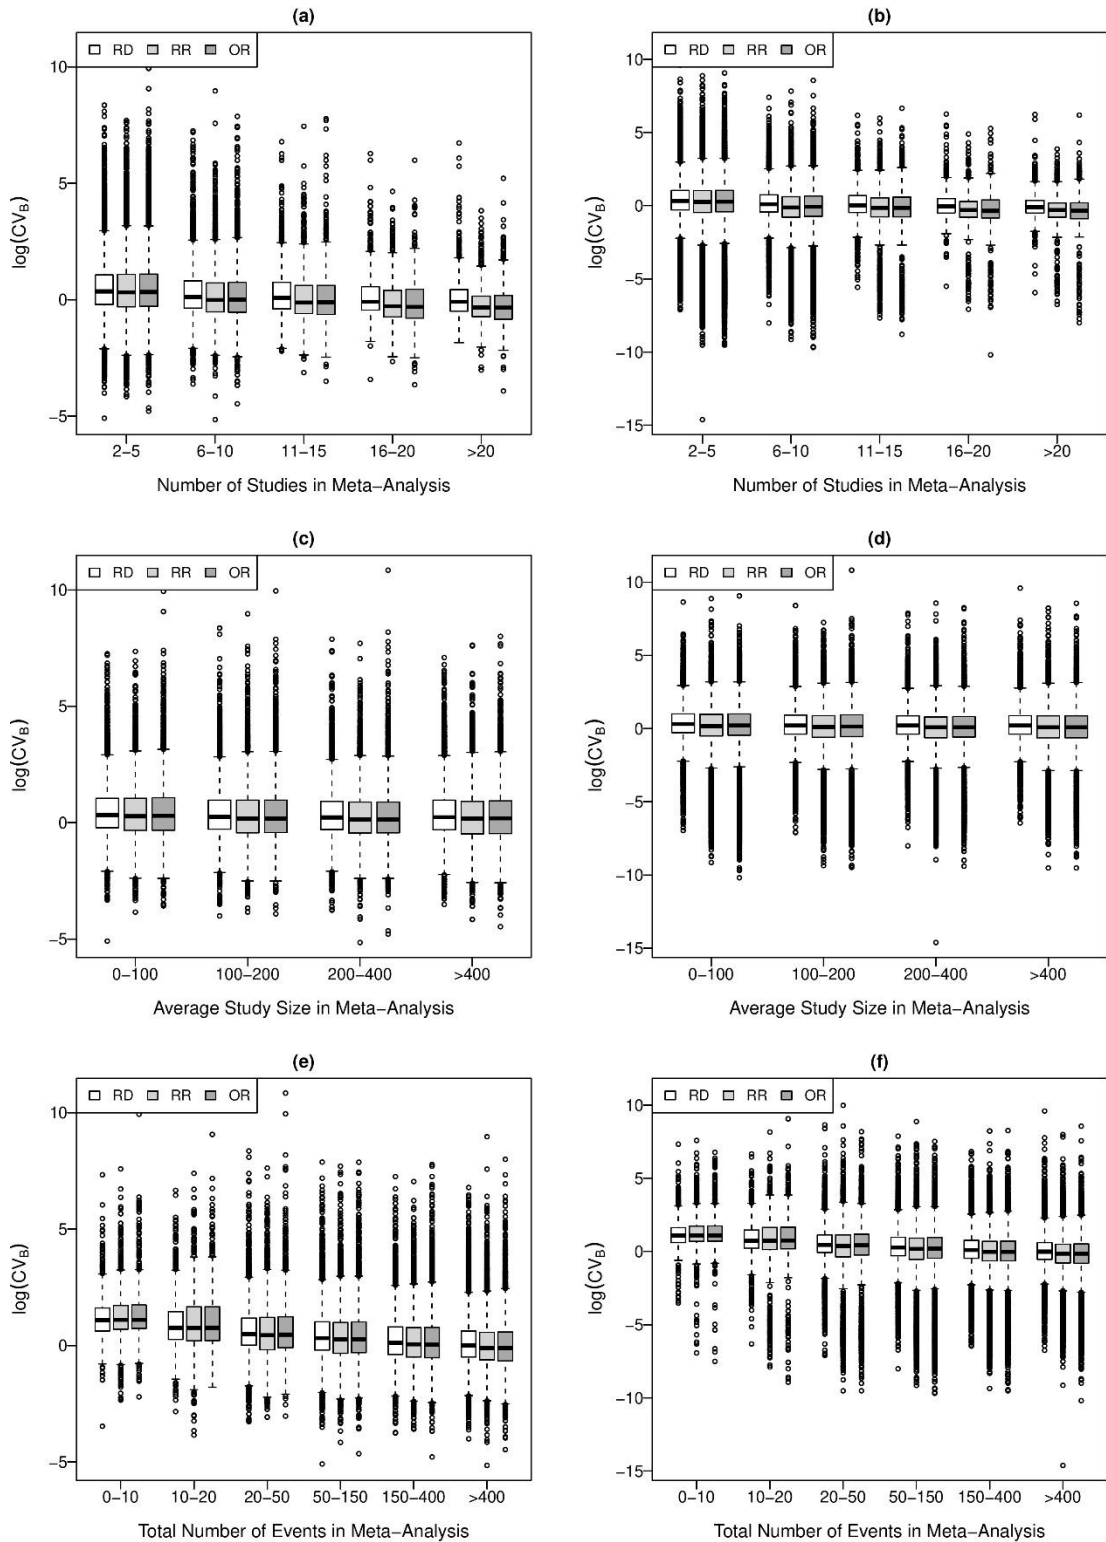

**Figure S5.** Boxplots of  $CV_B$  on a logarithmic scale for the RD, RR, and OR categorized by the number of studies (panels a and b), average study size (panels c and d), and total number of events (panels e and f). The left panels a, c, and e are based on the DerSimonian–Laird method, and the right panels b, d, and f are based on the restricted maximum likelihood (REML) method.

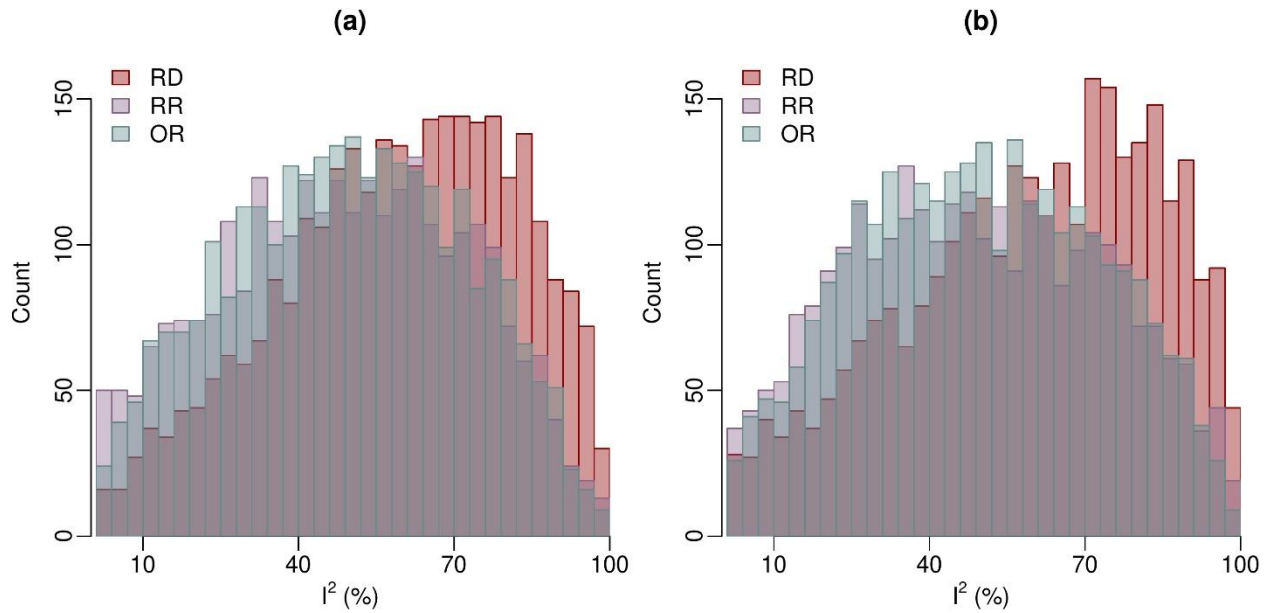

**Figure S6.** Histograms of  $I^2$  for the RD, RR, and OR, restricted to  $I^2 > 1\%$  for better visualizations, among the meta-analyses with the largest number of studies from each Cochrane review. Panel a is based on the DerSimonian–Laird method, and panel b is based on the restricted maximum likelihood (REML) method.

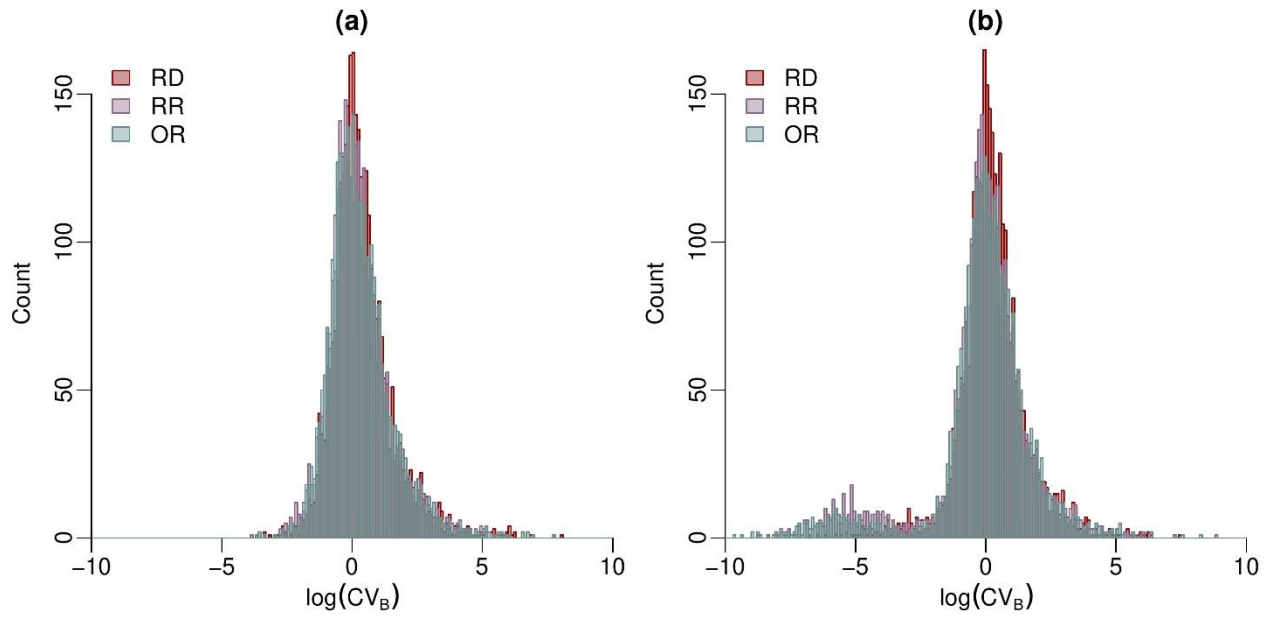

**Figure S7.** Histograms of  $CV_B$  on a logarithmic scale for the RD, RR, and OR among the meta-analyses with the largest number of studies from each Cochrane review. Panel a is based on the DerSimonian–Laird method, and panel b is based on the restricted maximum likelihood (REML) method.
